# Supplementary material for: Effectiveness of COVID-19 Vaccines in the General Population of an Italian Region before and during the Omicron Wave
Source: MDPI journal article supplement (doi:10.3390/vaccines10050662), 2022-04-22
Supplement: s1 [file s1]

**Effectiveness of COVID-19 vaccines in the general population of an Italian Region before and during the Omicron wave - Online supplemental material**

**Table S1.** Schematic definition of the study groups, follow-up, and outcomes.

|                           | Unvaccinated                                                                                                                                                                                                                                                                                                                                                                                                                                                                                                                                                                                                                                                                                             | 1 Dose                                                                                                                                                                             | 2 Doses                                                                                                                                                               | 3 Doses                                                                                                                                                        |
|---------------------------|----------------------------------------------------------------------------------------------------------------------------------------------------------------------------------------------------------------------------------------------------------------------------------------------------------------------------------------------------------------------------------------------------------------------------------------------------------------------------------------------------------------------------------------------------------------------------------------------------------------------------------------------------------------------------------------------------------|------------------------------------------------------------------------------------------------------------------------------------------------------------------------------------|-----------------------------------------------------------------------------------------------------------------------------------------------------------------------|----------------------------------------------------------------------------------------------------------------------------------------------------------------|
| <b>Inclusion criteria</b> | 1. Residency or domicile in the Abruzzo Region of Italy on 1 January 2020<br>2. No positive SARS-CoV-2 swab before the start of follow-up<br>3. Did not receive COVID-19 vaccines.                                                                                                                                                                                                                                                                                                                                                                                                                                                                                                                       | 3. Received only one dose of BNT162b2, mRNA-1273 or ChAdOx1 nCoV-19 vaccines, from January 2, 2021 (date of the administration of the first vaccine dose), up to December 18, 2021 | 3. Received only one dose of JNJ-78436735 vaccine, or only two doses of BNT162b2, mRNA-1273 or ChAdOx1 nCoV-19 vaccines, from January 2, 2021 up to December 18, 2021 | 3. Received two doses of JNJ-78436735 vaccine, or three doses of BNT162b2, mRNA-1273 or ChAdOx1 nCoV-19 vaccines, from January 2, 2021 up to December 18, 2021 |
| <b>Follow-up</b>          | For the comparison versus the group "1 dose", the follow-up started 14 days after the first administration of the first vaccine dose to the population (January 16, 2021)<br>For the comparison versus the group "2 doses", the follow-up started 14 days after the first administration of the second vaccine dose to the population (January 31, 2021)<br>For the comparison versus the group "3 doses", the follow-up started 14 days after the start of the mass administration of the third vaccine dose to the population (September 17, 2021)<br>For all comparisons and groups, the follow-up ended the day of the outcome or on February 18, 2022, for those who did not experience the outcome | The follow-up started 14 days after the single vaccine dose                                                                                                                        | The follow-up started 14 days after the second vaccine dose                                                                                                           | The follow-up started 14 days after the third vaccine dose                                                                                                     |
| <b>Outcomes</b>           | 1. SARS-CoV-2 infection, detected through RT-PCR (Reverse transcription polymerase chain reaction, tested through nasopharyngeal swabs by the accredited laboratories of the Region)<br>2. Virologically-confirmed COVID-19 hospitalization (diagnosed by a specialist physician)<br>3. COVID-19-related death (inside or outside the hospital)                                                                                                                                                                                                                                                                                                                                                          |                                                                                                                                                                                    |                                                                                                                                                                       |                                                                                                                                                                |

**Table S2.** Multivariable analysis <sup>ψ</sup> predicting SARS-CoV-2 infection, COVID-19 hospitalization, and COVID-19-related death (complete results of the logistic models reported in Table 3 - Whole period, all subjects).

|                              | <b>SARS-CoV-2</b>  | <b>COVID-19 hospitalization <sup>A</sup></b> | <b>COVID-19-related death</b> |
|------------------------------|--------------------|----------------------------------------------|-------------------------------|
|                              | OR (95% CI)        | OR (95% CI)                                  | OR (95% CI)                   |
| <i>Vaccination</i>           |                    |                                              |                               |
| Unvaccinated                 | 1 (Ref. cat.)      | 1 (Ref. cat.)                                | 1 (Ref. cat.)                 |
| Vaccinated (any dose)        | 0.71 (0.70-0.72)*  | 0.10 (0.09-0.11)*                            | 0.05 (0.04-0.06)*             |
| <i>Age class, years</i>      |                    |                                              |                               |
| 60 or more                   | 1 (Ref. cat.)      | 1 (Ref. cat.)                                | 1 (Ref. cat.)                 |
| 30-59                        | 2.32 (2.28-2.36)*  | 0.16 (0.14-0.19)*                            | 0.09 (0.07-0.11)*             |
| 0-29                         | 3.67 (3.61-3.74)*  | 0.01 (0.01-0.02)*                            | NE                            |
| Male gender                  | 0.92 (0.91-0.93)*  | 1.28 (1.17-1.40)*                            | 1.56 (1.37-1.77)*             |
| Hypertension                 | 0.89 (0.87-0.91)*  | 1.21 (1.08-1.36)**                           | 1.17 (1.00-1.35)**            |
| Diabetes                     | 0.97 (0.94-1.00)   | 1.37 (1.22-1.55)*                            | 1.36 (1.17-1.58)*             |
| Major cardiovascular disease | 1.27 (1.23-1.30)*  | 2.42 (2.15-2.71)*                            | 2.43 (2.09-2.82)*             |
| Kidney disease               | 0.92 (0.87-0.97)** | 1.23 (1.06-1.43)**                           | 1.00 (0.83-1.20)              |
| COPD                         | 1.15 (1.11-1.20)*  | 1.60 (1.40-1.84)*                            | 1.45 (1.22-1.72)*             |
| Cancer                       | 0.85 (0.83-0.88)*  | 1.11 (0.97-1.27)                             | 1.15 (0.98-1.36)              |

OR = Odds Ratio; CI = Confidence Interval; Ref. cat. = Reference category. NE = Not estimable (0 cases in one or both of the groups under comparison). COPD: chronic obstructive pulmonary diseases. \* p<0.001; \*\* p<0.05. <sup>ψ</sup> Logistic regression models including 1,275,823 subjects (the total number of subjects included in the main comparison between 2 doses and no vaccine). <sup>A</sup> Virologically-confirmed COVID-19 disease, diagnosed by a specialist physician and requiring hospital admission.

**Table S3.** Multivariable analysis <sup>ψ</sup> of the effectiveness of COVID-19 vaccines during pre-Omicron waves <sup>A</sup>.

|                                            | <b>SARS-CoV-2</b>  | <b>COVID-19<br/>hospitalization <sup>B</sup></b> | <b>COVID-19-related<br/>death</b> |
|--------------------------------------------|--------------------|--------------------------------------------------|-----------------------------------|
|                                            | OR (95% CI)        | OR (95% CI)                                      | OR (95% CI)                       |
| <b>Health status</b>                       |                    |                                                  |                                   |
| <i>Vaccine doses</i>                       |                    |                                                  |                                   |
| All subjects                               |                    |                                                  |                                   |
| Unvaccinated                               | 1 (Ref. cat.)      | 1 (Ref. cat.)                                    | 1 (Ref. cat.)                     |
| 1 dose                                     | 0.57 (0.53-0.61)*  | 0.46 (0.34-0.62)*                                | 0.46 (0.32-0.64)*                 |
| 2 doses                                    | 0.25 (0.24-0.25)*  | 0.04 (0.03-0.05)*                                | 0.04 (0.03-0.05)*                 |
| 3 doses                                    | 0.12 (0.10-0.13)*  | 0.03 (0.01-0.09)*                                | 0.02 (0.00-0.12)*                 |
| Infected subjects only                     |                    |                                                  |                                   |
| Unvaccinated                               | --                 | 1 (Ref. cat.)                                    | 1 (Ref. cat.)                     |
| 1 dose                                     | --                 | 0.40 (0.28-0.57)*                                | 0.28 (0.19-0.43)*                 |
| 2 doses                                    | --                 | 0.07 (0.06-0.09)*                                | 0.05 (0.04-0.07)*                 |
| 3 doses                                    | --                 | 0.15 (0.05-0.44)*                                | 0.06 (0.01-0.43)*                 |
| <b>Vaccine type (2 doses vs. none)</b>     |                    |                                                  |                                   |
| Unvaccinated                               | 1 (Ref. cat.)      | 1 (Ref. cat.)                                    | 1 (Ref. cat.)                     |
| BNT162b2                                   | 0.25 (0.24-0.25)*  | 0.06 (0.05-0.08)*                                | 0.05 (0.04-0.07)*                 |
| mRNA-1273                                  | 0.14 (0.13-0.15)*  | 0.03 (0.01-0.06)*                                | 0.02 (0.01-0.06)*                 |
| ChAdOx1 nCoV-19                            | 0.42 (0.40-0.44)** | 0.01 (0.00-0.02)*                                | 0.01 (0.00-0.02)*                 |
| JNJ-78436735                               | 0.57 (0.51-0.64)*  | 0.03 (0.00-0.18)*                                | 0.00 (NE)                         |
| Mixed <sup>C</sup>                         | 0.24 (0.21-0.28)*  | 0.03 (0.00-0.23)*                                | 0.04 (0.01-0.30)*                 |
| <b>Age-class, years (2 doses vs. none)</b> |                    |                                                  |                                   |
| 60 or more                                 | 0.33 (0.31-0.35)*  | 0.05 (0.04-0.06)*                                | 0.04 (0.03-0.05)*                 |
| 30-59                                      | 0.29 (0.27-0.30)*  | 0.02 (0.01-0.04)*                                | 0.01 (0.00-0.03)*                 |
| 0-29                                       | 0.16 (0.15-0.17)*  | 0.08 (0.02-0.39)*                                | NE                                |

OR = Odds Ratio; CI = Confidence Interval; Ref. cat. = Reference category. NE = Not estimable (0 cases in one or both of the groups under comparison). \* p<0.001. <sup>ψ</sup> Logistic regression models adjusted for age, gender, hypertension, diabetes, major cardiovascular diseases, chronic obstructive pulmonary diseases, kidney diseases, and cancer. <sup>A</sup> Including only the outcomes that occurred from the start of follow-up to December 26, 2021, when the proportion of Omicron variant in the available positive swabs was lower than 50%. <sup>B</sup> Virologically-confirmed COVID-19 disease, diagnosed by a specialist physician and requiring hospital admission. <sup>C</sup> Subjects who received two or three different vaccines.
